# Supplementary material for: Photocatalytic degradation of tetracycline hydrochloride by lanthanum doped TiO2@g-C3N4 activated persulfate under visible light irradiation
Source: Royal Society of Chemistry journal article supplement (doi:10.1039/d3ra00729d), 2023-01-01
Supplement: d3ra00729d1.pdf [file d3ra00729d1.pdf]

Table S1 Content of each element ratio in different samples.

| Element | Atomic %                                             |                                                   |                                 |
|---------|------------------------------------------------------|---------------------------------------------------|---------------------------------|
|         | La-TiO <sub>2</sub> @g-C <sub>3</sub> N <sub>4</sub> | TiO <sub>2</sub> @g-C <sub>3</sub> N <sub>4</sub> | g-C <sub>3</sub> N <sub>4</sub> |
| C K     | 29.19                                                | 32.43                                             | 42.93                           |
| N K     | 46.48                                                | 48.95                                             | 57.07                           |
| O K     | 13                                                   | 10.73                                             |                                 |
| Ti K    | 7.48                                                 | 7.89                                              |                                 |
| La K    | 3.85                                                 |                                                   |                                 |

Table S2 Effects of La content on the physical properties of La-TiO<sub>2</sub>@g-C<sub>3</sub>N<sub>4</sub> samples.

| Sample                                               | S <sub>BET</sub> (m <sup>2</sup> /g) | Average pore size (nm) | Pore Volume (cm <sup>3</sup> /g) |
|------------------------------------------------------|--------------------------------------|------------------------|----------------------------------|
| La-TiO <sub>2</sub> @g-C <sub>3</sub> N <sub>4</sub> | 14.2                                 | 13.98                  | 0.046                            |
| g-C <sub>3</sub> N <sub>4</sub>                      | 7.3                                  | 32                     | 0.027                            |
| TiO <sub>2</sub>                                     | 43.1                                 | 7.1                    | 0.035                            |

Table S3 Reaction rate constants and their correlation coefficients under different operating conditions

| No. | Vis | Gas            | 4% La/TiO <sub>2</sub> @g-C <sub>3</sub> N <sub>4</sub> | PDS (mmol/L) | pH <sub>0</sub> | C <sub>0</sub> (mg/L) | TBA (mmol/L) | EtOH (mmol/L) | BQ (mmol/L) | K <sub>2</sub> Cr <sub>2</sub> O <sub>7</sub> (mmol/L) | EDTA (mmol/L) | <i>k</i> (min <sup>-1</sup> ) | r <sup>2</sup> |
|-----|-----|----------------|---------------------------------------------------------|--------------|-----------------|-----------------------|--------------|---------------|-------------|--------------------------------------------------------|---------------|-------------------------------|----------------|
| 1   |     | Air            | 0.5                                                     | 6            | 6               | 20                    |              |               |             |                                                        |               | 0.0095                        | 0.99           |
| 2   | √   | Air            | 0.5                                                     |              | 6               | 20                    |              |               |             |                                                        |               | 0.0055                        | 0.99           |
| 3   | √   | Air            | 0.5                                                     | 6            | 6               | 20                    |              |               |             |                                                        |               | 0.083                         | 0.99           |
| 4   | √   | Air            | 0.2                                                     | 6            | 6               | 20                    |              |               |             |                                                        |               | 0.048                         | 0.98           |
| 5   | √   | Air            | 1.0                                                     | 6            | 6               | 20                    |              |               |             |                                                        |               | 0.091                         | 0.97           |
| 6   | √   | Air            | 1.5                                                     | 6            | 6               | 20                    |              |               |             |                                                        |               | 0.099                         | 0.93           |
| 7   | √   | Air            | 0.5                                                     | 6            | 3               | 20                    |              |               |             |                                                        |               | 0.033                         | 0.99           |
| 8   | √   | Air            | 0.5                                                     | 6            | 5               | 20                    |              |               |             |                                                        |               | 0.042                         | 0.98           |
| 9   | √   | Air            | 0.5                                                     | 6            | 7               | 20                    |              |               |             |                                                        |               | 0.069                         | 0.99           |
| 10  | √   | Air            | 0.5                                                     | 6            | 9               | 20                    |              |               |             |                                                        |               | 0.026                         | 0.99           |
| 11  | √   | Air            | 0.5                                                     | 6            | 6               | 10                    |              |               |             |                                                        |               | 0.145                         | 0.99           |
| 12  | √   | Air            | 0.5                                                     | 6            | 6               | 20                    |              |               |             |                                                        |               | 0.116                         | 0.99           |
| 13  | √   | Air            | 0.5                                                     | 6            | 6               | 40                    |              |               |             |                                                        |               | 0.064                         | 0.99           |
| 14  | √   | Air            | 0.5                                                     | 6            | 6               | 20                    | 10           |               |             |                                                        |               | 0.066                         | 0.98           |
| 15  | √   | Air            | 0.5                                                     | 6            | 6               | 20                    |              | 10            |             |                                                        |               | 0.031                         | 0.98           |
| 16  | √   | Air            | 0.5                                                     | 6            | 6               | 20                    |              |               | 10          |                                                        |               | 0.050                         | 0.97           |
| 17  | √   | Air            | 0.5                                                     | 6            | 6               | 20                    |              |               |             | 10                                                     |               | 0.062                         | 0.99           |
| 18  | √   | Air            | 0.5                                                     | 6            | 6               | 20                    |              |               |             |                                                        | 10            | 0.055                         | 0.99           |
| 19  | √   | O <sub>2</sub> | 0.5                                                     | 6            | 6               | 20                    |              |               |             |                                                        |               | 0.102                         | 0.99           |
| 20  | √   | N <sub>2</sub> | 0.5                                                     | 6            | 6               | 20                    |              |               |             |                                                        |               | 0.0304                        | 0.99           |
